# Supplementary material
Source: PubMed Central journal article supplement (PMC4548823)
Supplement: NIHMS688524-supplement-1.pdf [file NIHMS688524-supplement-1.pdf]

## **SUPPLEMENTAL FIGURE LEGENDS**

### **Figure S1. Effect of PARP1 and ATM inhibition on Brca1 recruitment**

ChIP of Brca1 in MCF7 cells expressing ddi-Ppol as described in Figure 1. Cells were treated with (A) DMSO or 5  $\mu$ M PARP1 inhibitor olaparib (AZD2281), (B) DMSO or 5  $\mu$ M ATM inhibitor CP466722 for 1 h prior to ddi-Ppol induction.

### **Figure S2. Knock-down of Nbs1, Brca1 and Rap80**

Immunoblot showing a knock-down of Nbs1, Brca1 and Rap80 in MCF7 cells. Cells were treated with either non-targeting control, Nbs1, Brca1 or Rap80 targeting siRNA.

### **Figure S3. Accumulation of MCF7 cells in G1 following serum starvation**

Cell cycle analysis of MCF7 cells by propidium iodide staining after cultivation in medium containing either 10% FBS or 0.1% FBS for 24 h.

### **Figure S4. DSB repair in cycling cells depends on Brca1 and NBS1 but not RAP80**

DNA repair measured by quantitative real-time PCR spanning the unique I-Ppol cleavage site at chromosome 1 in cycling MCF7 cells expressing ddi-Ppol that were cultivated in medium containing 10% fetal bovine serum for 24 h prior to DSB induction. Time indicated is hours following addition of 4-OHT. Data of three independent experiments are shown as mean +/- SEM.

### **Figure S5. RAP80 suppresses excessive DSB processing**

ChIP of RPA32 in MCF7 cells expressing ddi-Ppol that were cultivated in medium containing 10% fetal bovine serum prior to DSB induction. Cells were transfected with either non-targeting control siRNA or RAP80 targeting siRNA. Data of two independent experiments are shown as mean +/- SEM.
